# Supplementary material for: Synthesis and structure of nickel(ii) thiocarboxamide complexes: effect of ligand substitutions on DNA/protein binding, antioxidant and cytotoxicity
Source: Royal Society of Chemistry journal article supplement (doi:10.1039/c5ra06112a), 2015-01-01
Supplement: c5ra06112a1.pdf [file c5ra06112a1.pdf]

## Electronic Supplementary Information

For

**Synthesis and Structure of Nickel(II) thiocarboxamide Complexes: Effect of ligand substitution on DNA/Protein binding, Antioxidant and Cytotoxicity.**

Ramasamy Raj Kumar, Mohamed Kasim Mohamed Subarkhan, Rengan Ramesh\*

*\*School of Chemistry, Bharathidasan University, Tiruchirappalli 620024, India.*

\*To whom correspondence should be made: Tel: +91-431-2407053, Fax: +91-431-2407045, E-mail: rrameshbdu@gmail.com

### List of items:

1.  $^1\text{H}$  and  $^{13}\text{C}$  NMR Spectra of the complexes 1-4..... S2-S9
2. Absorbance spectra of the complexes 1-4.....S10-S11
3. MTT Assay of complex 3 .....S12

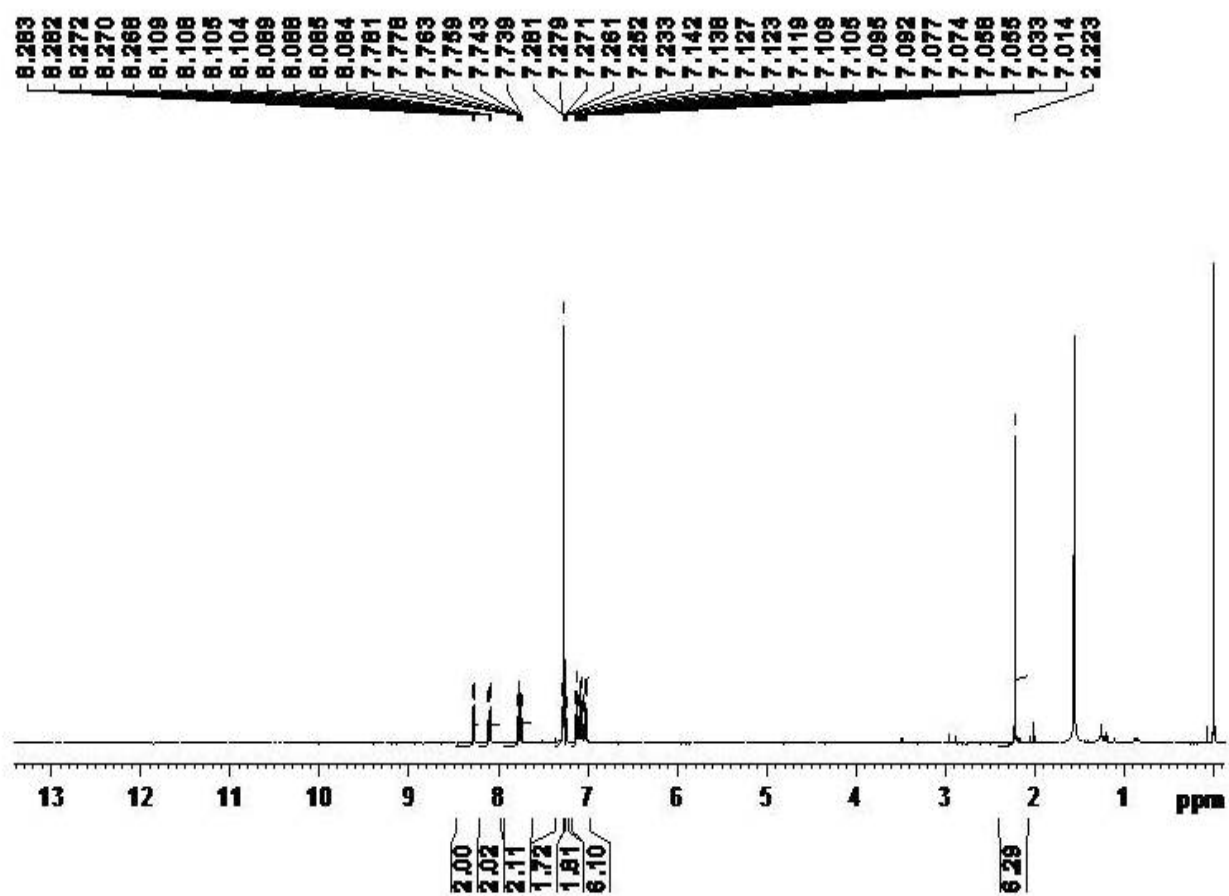

Figure S1:  $^1\text{H}$  NMR of  $[\text{Ni}(\text{L}1)_2]$  in  $\text{CDCl}_3$

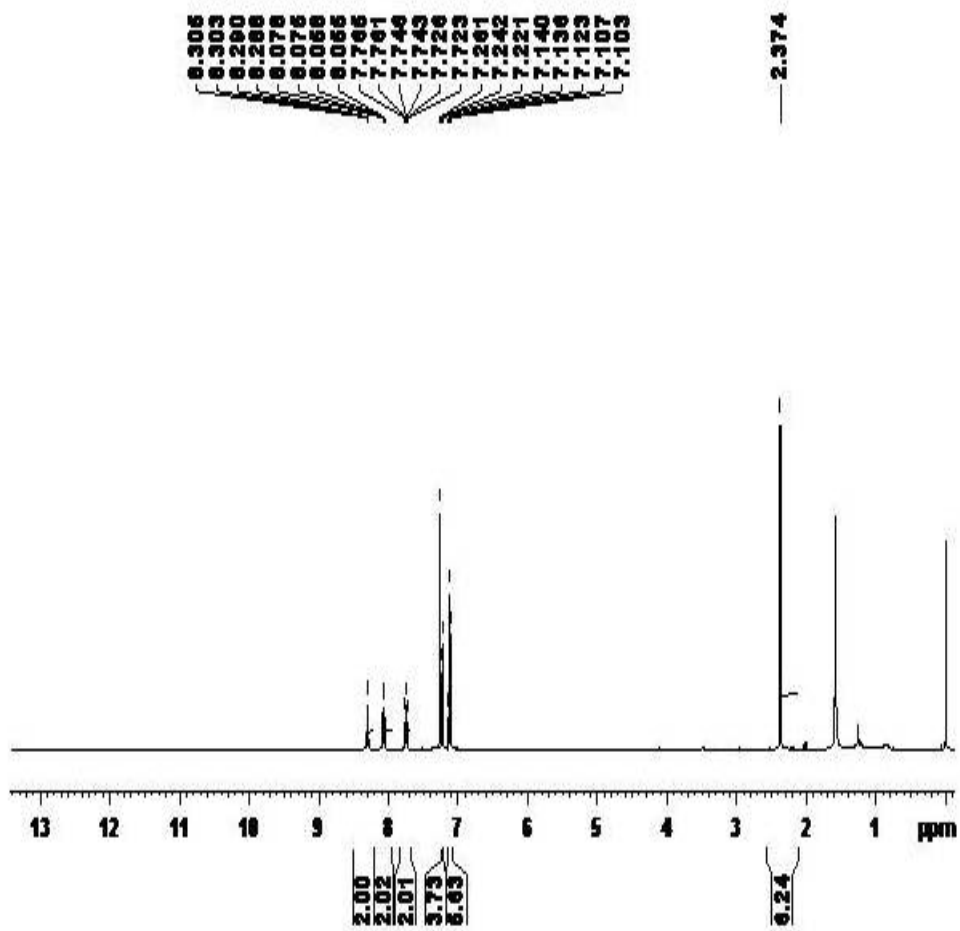

Figure S2:  $^1\text{H}$  NMR of  $[\text{Ni}(\text{L}2)_2]$  in  $\text{CDCl}_3$

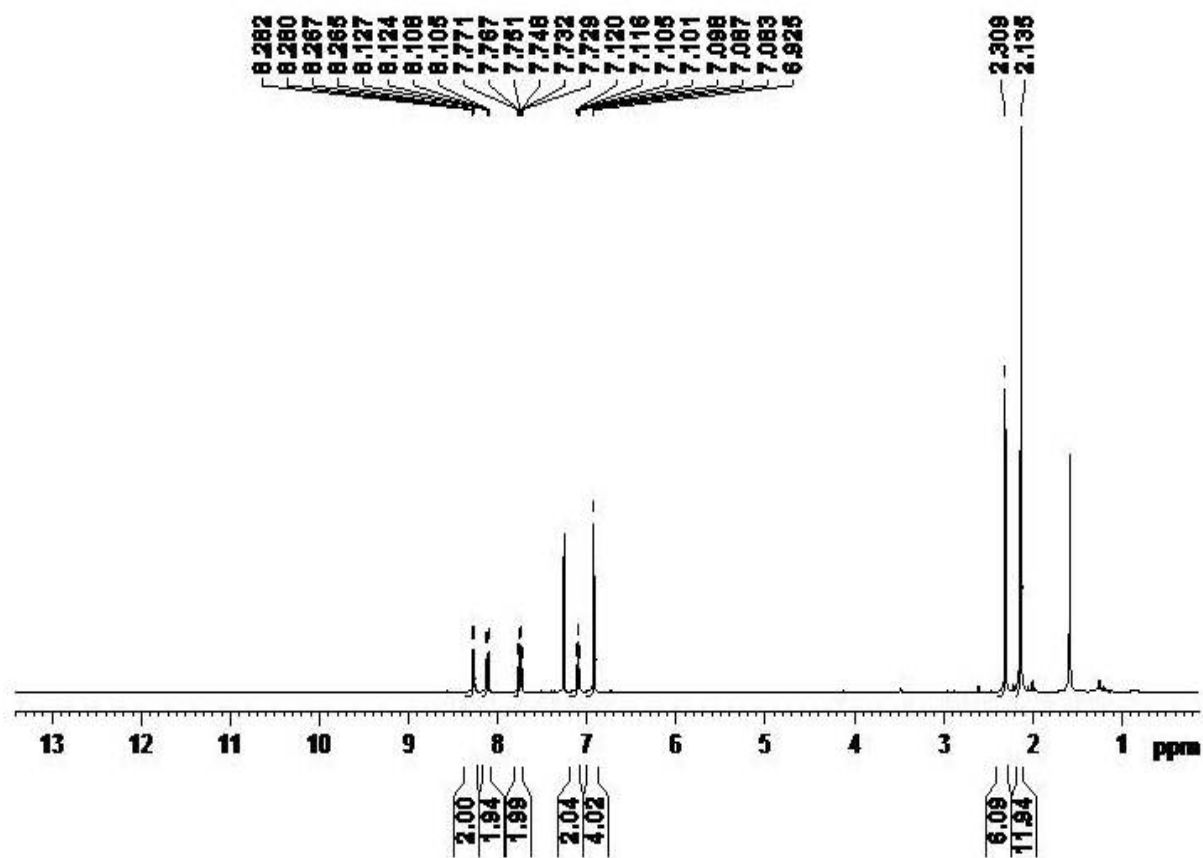

Figure S3:  $^1\text{H}$  NMR of  $[\text{Ni}(\text{L}3)_2]$  in  $\text{CDCl}_3$

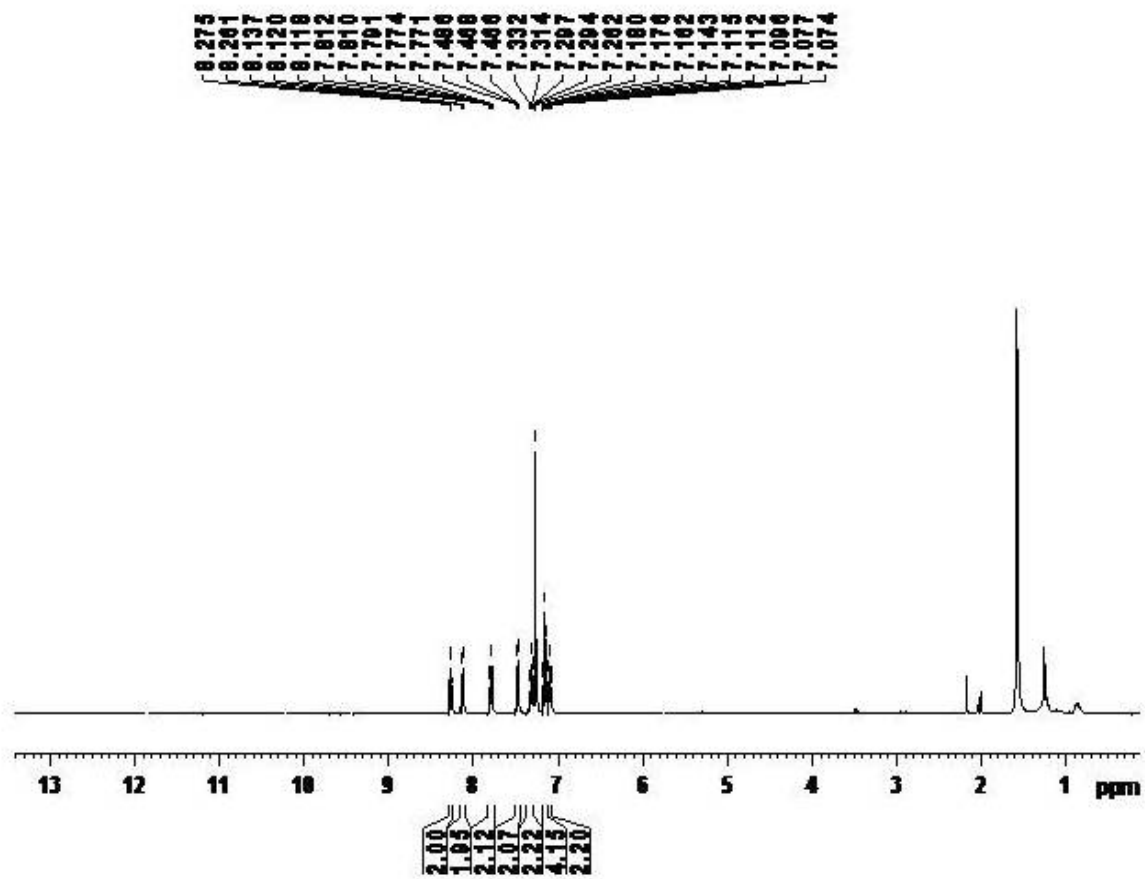

Figure S4:  $^1\text{H}$  NMR of  $[\text{Ni}(\text{L}4)_2]$  in  $\text{CDCl}_3$

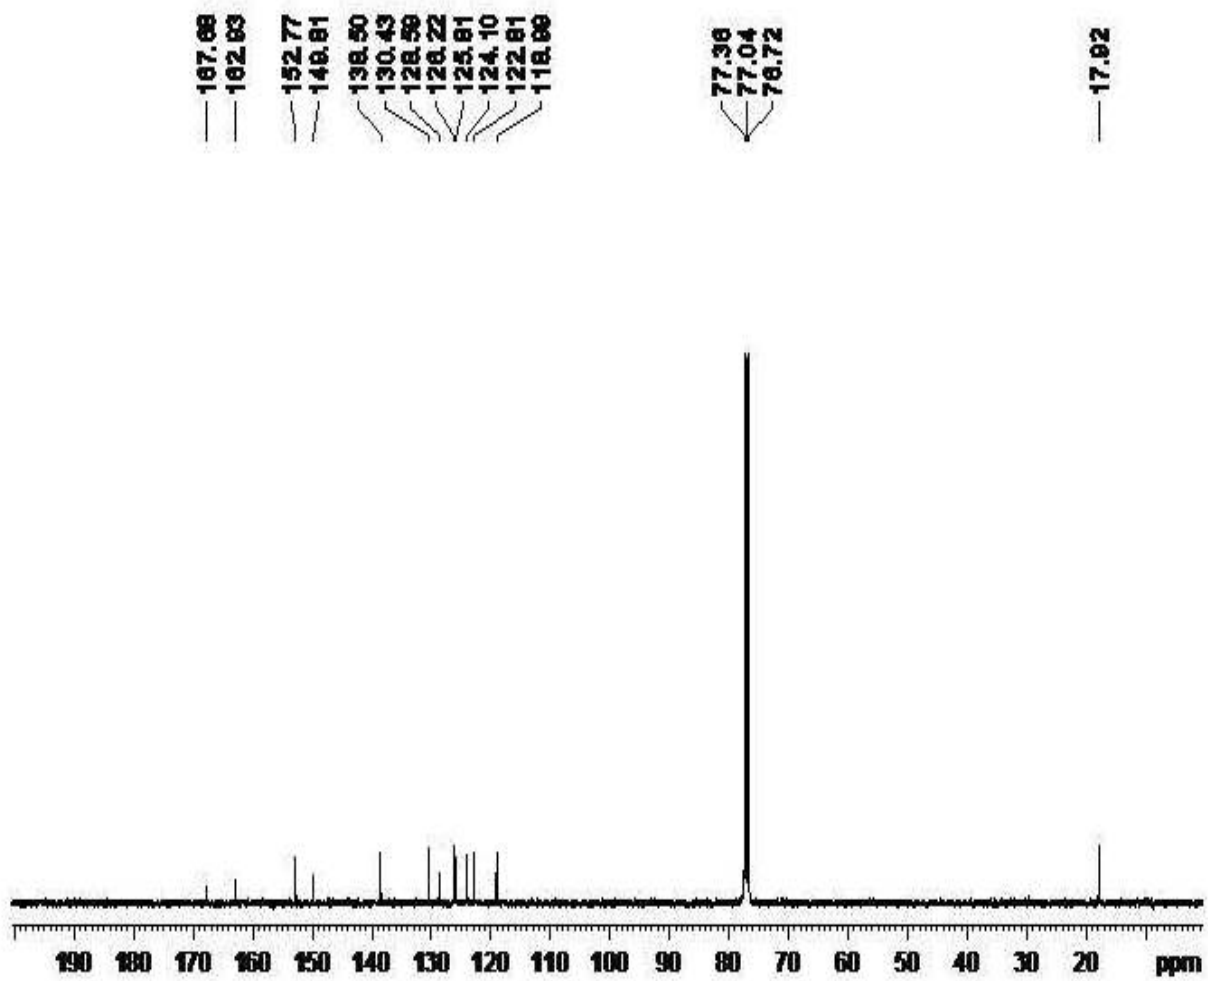

Figure S5:  $^{13}\text{C}$  NMR of  $[\text{Ni}(\text{L}1)_2]$  in  $\text{CDCl}_3$

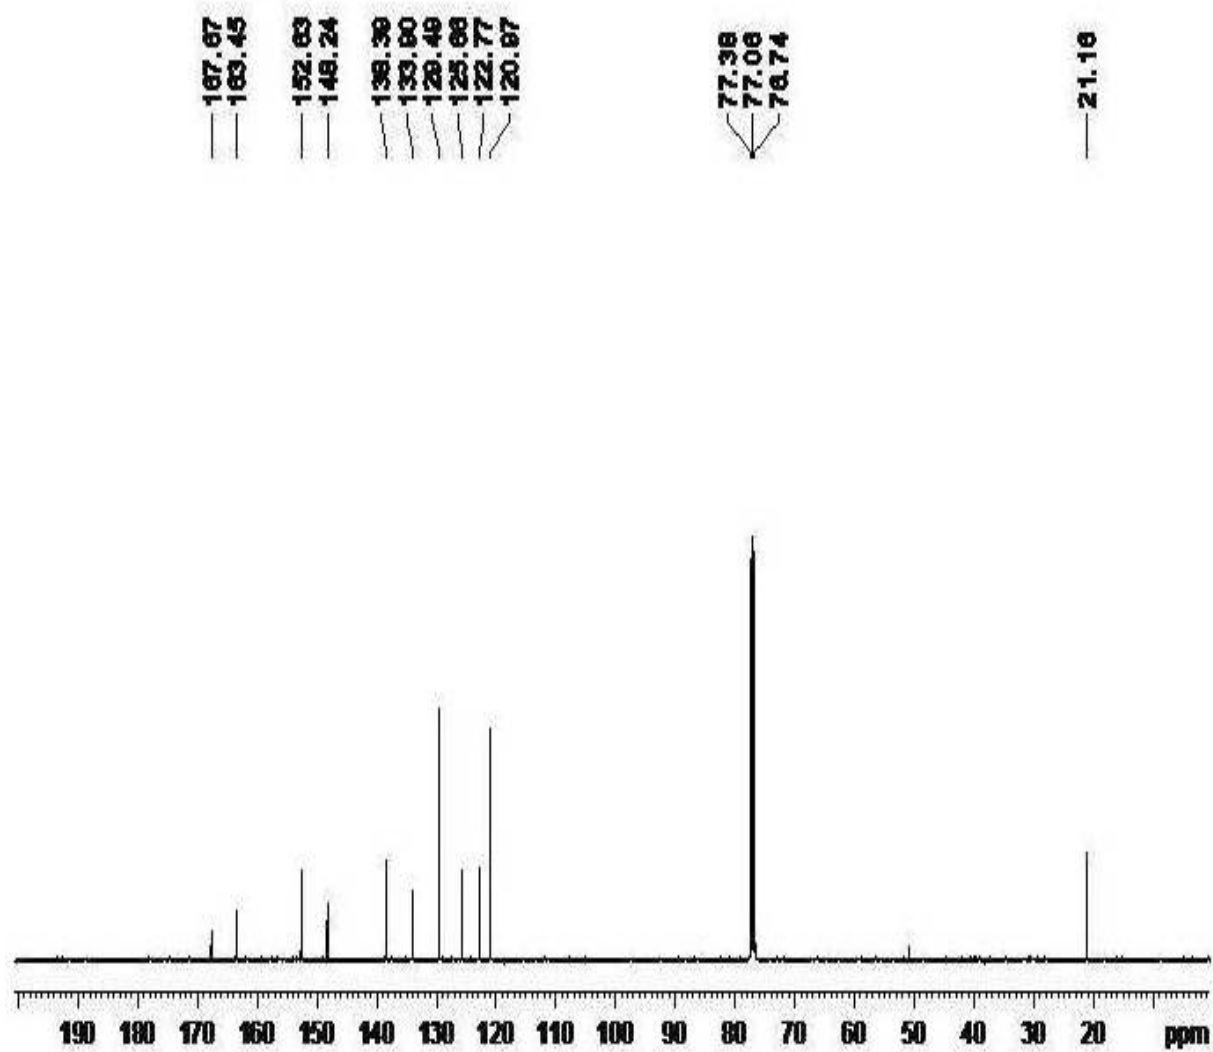

Figure S6:  $^{13}\text{C}$  NMR of  $[\text{Ni}(\text{L}2)_2]$  in  $\text{CDCl}_3$

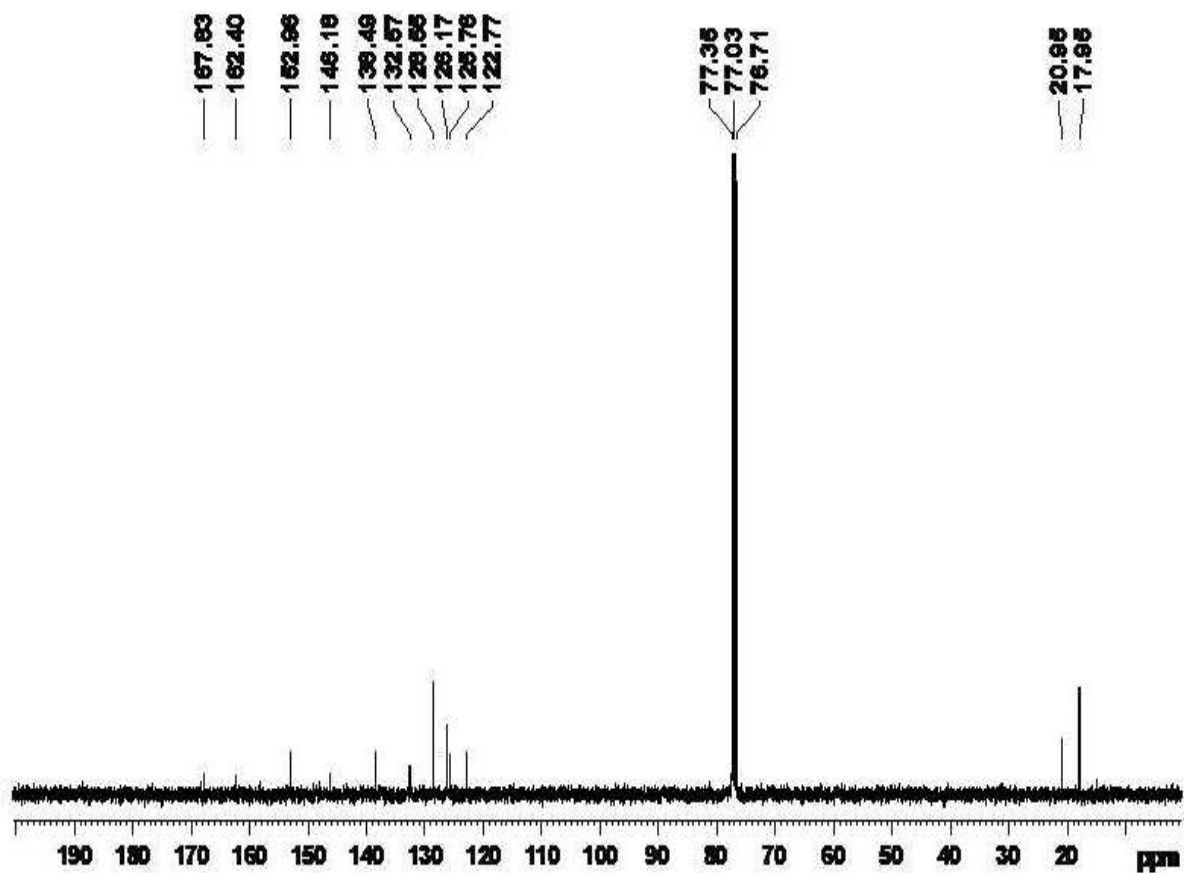

Figure S7:  $^{13}\text{C}$  NMR of  $[\text{Ni}(\text{L}3)_2]$  in  $\text{CDCl}_3$



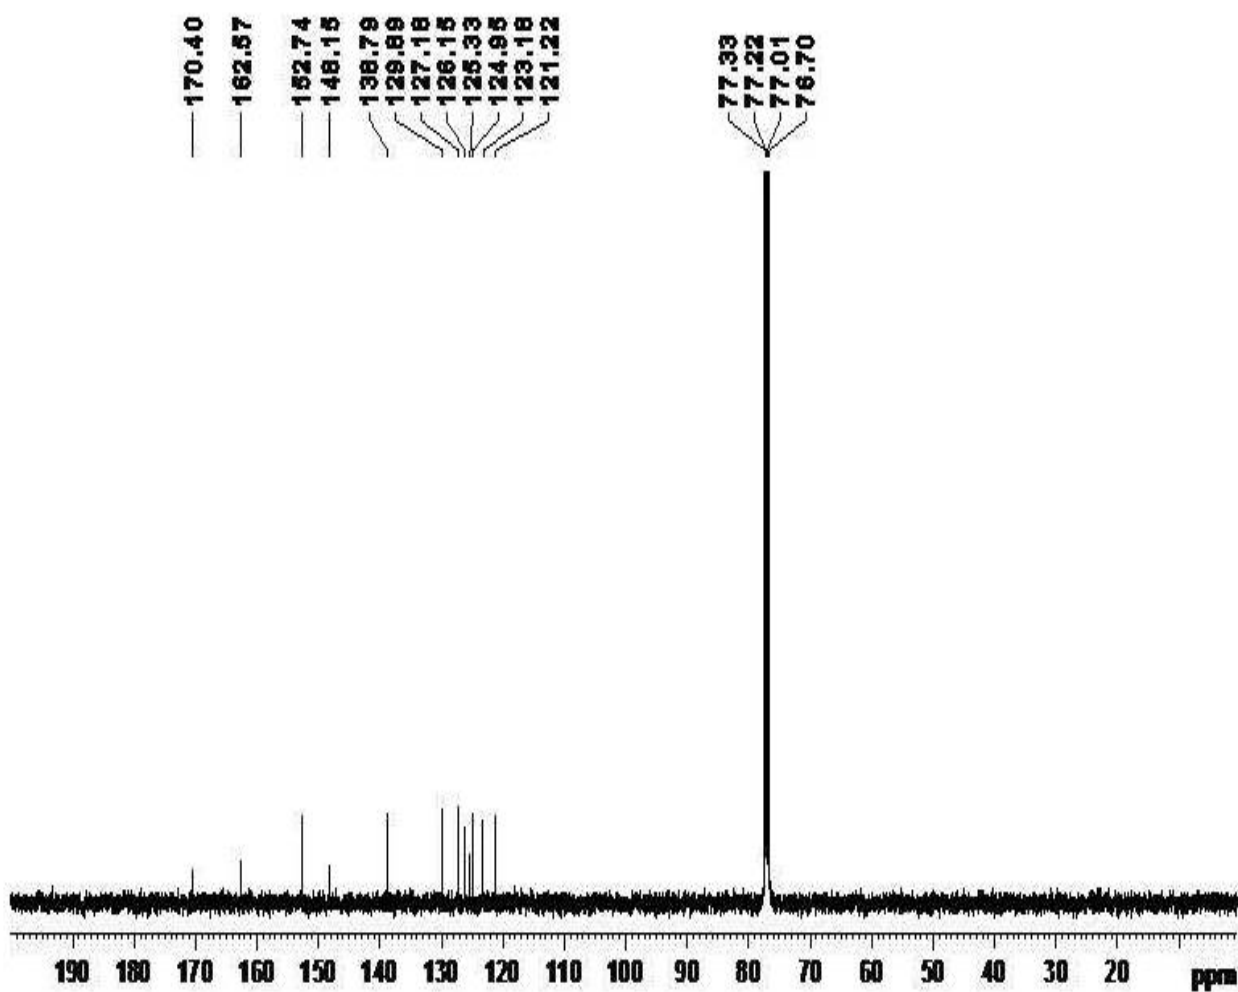

Figure S8:  $^{13}\text{C}$  NMR of  $[\text{Ni}(\text{L4})_2]$  in  $\text{CDCl}_3$

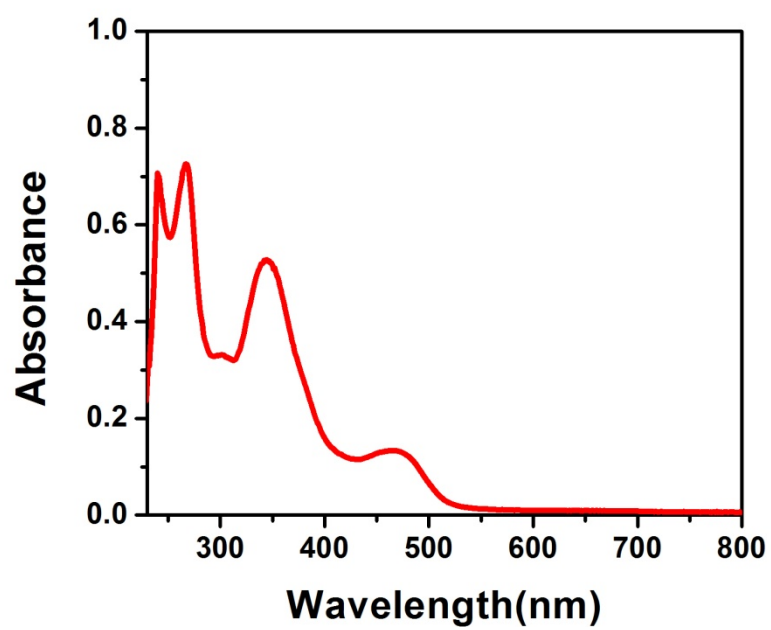

Figure S9: UV-Vis spectrum of [Ni(L1)<sub>2</sub>] in CHCl<sub>3</sub>

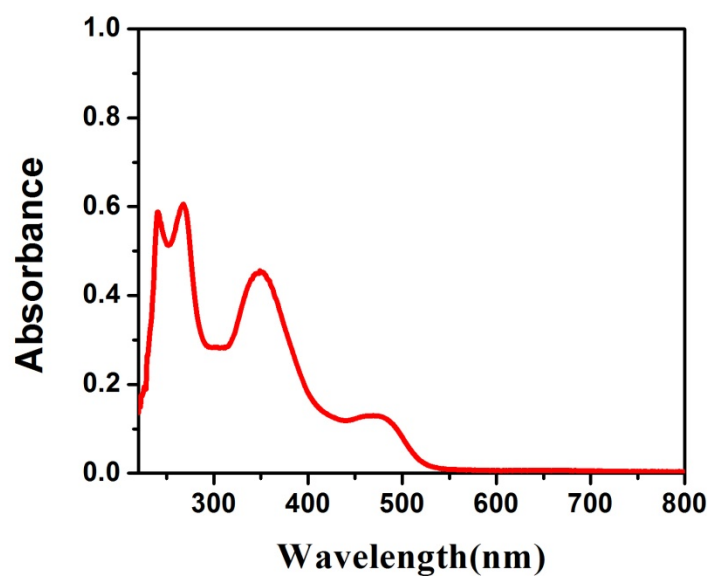

Figure S10: UV-Vis spectrum of [Ni(L2)<sub>2</sub>] in CHCl<sub>3</sub>

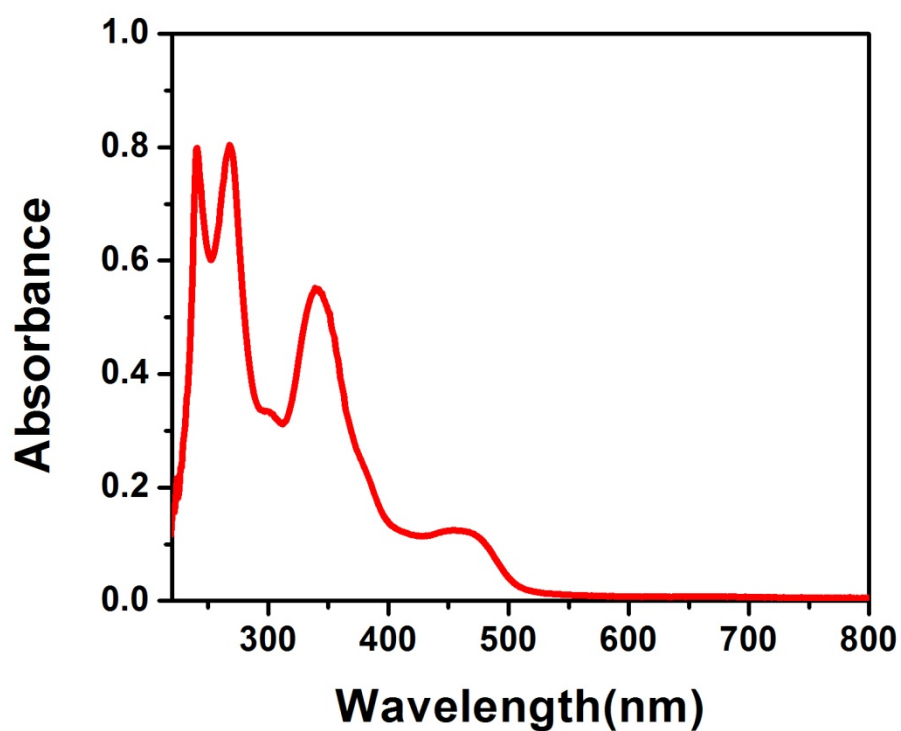

Figure S11: UV-Vis spectrum of [Ni(L3)<sub>2</sub>] in CHCl<sub>3</sub>

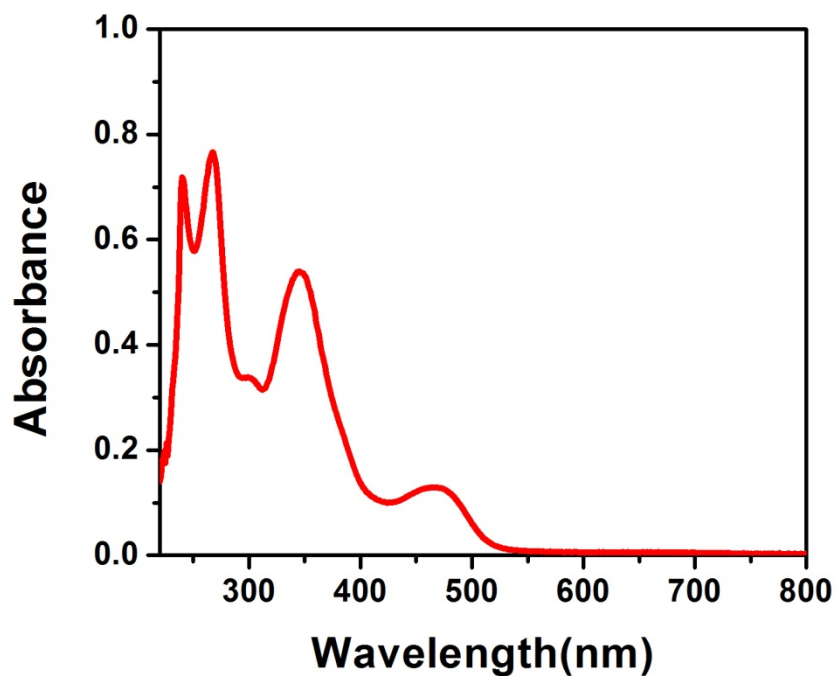

Figure S12: UV-Vis spectrum of [Ni(L4)<sub>2</sub>] in CHCl<sub>3</sub>

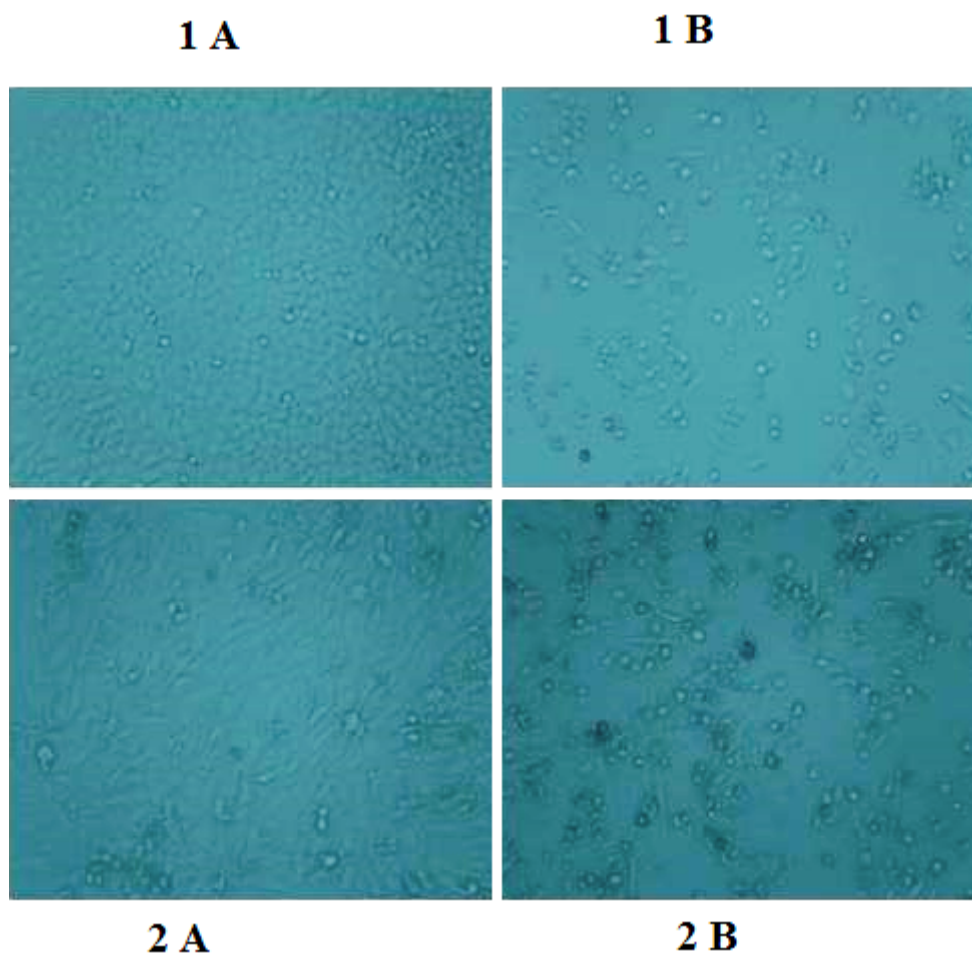

Figure S13: MTT assay of (1) Human cervical cancer cells. (2) MG 63 cells [(a) normal Cells (untreated), (b) treated with complex 3 at 48 h incubation]
